# Supplementary material
Source: publisher figshare collection journal article supplement (https://gsajournals.figshare.com/ndownloader/files/14645228)
Supplement: Supplementary file 1 [file 14645228]

## Sheet: Sheet1
Table S7. Sequence variants judged to be sequencing errors or polymorphisms
Gene	Variant (DNA)	Variant (protein)	# strains	max # reads	% variant in max	comment
BRR2	n.3592A>G	Arg1198Gly	1	13	15
BRR2	n.3638G>A	Arg1213His	1	15	13
BRR2	n.3833A>G	Gln1278Arg	1	12	16
BRR2	n.2586A>C	Gln862His	1	8	25
BRR2	n.6029A>G	Glu2010Gly	2	10	20
BRR2	n.3783A>G	Pro1261Pro	1	15	13
BRR2	n.3703T>C	Ser1235Pro	1	7	28
BUD13	n.797A>G	Tyr266Cys	1	15	13
BUD27	n.1517_1606delGGGAGCCTGCTGTCAACGATATAGTGGAAAGGAAGCCTGTTGTGGGGGATATTATAGAAAAAGAACCTACTATCAACGATATAGTGGAAA	Arg506_Glu535del	1	168	10
BUD27	n.893A>G	Gln298 Arg	1	4	50
BUD27	n.1538T>C	Ile513Thr	1	150	9
BUD27	n.1567A>G	Ile523Val	2	297	8
BUD27	n.1461_1490delACCTGTTGTGGGGGATGTTATAGAAAAAGA	Pro 488_Glu497del	46	27	7
CEF1	n.618delA	Lys206fs	2	114	13
CWC15	n.4A>G	Thr2Ala	1	9	22
CWC15	n.250A>G	Thr84Ala	1	10	30
CWC2	n.576A>C	Ala192Ala	1	13	15
CWC2	n.584C>T	Ala195Val	1	10	20
CWC2	n.522A>G	Arg174Arg	1	12	16
CWC2	n.642T>A	Asp214Glu	1	68	8
CWC2	n.618A>G	Leu206Leu	1	80	10
CWC23	n.672C>T	Phe224Phe	1	14	14
DED1	n.1692A>G	Ala564Ala	1	12	16
DED1	n.1557T>A	Thr519Thr	1	12	16
ECM2	n.1091T>A	Ile364Lys	1	10	20
ECM2	n.946T>A	Leu316Met	1	8	25
ECM2	n.953A>G	Lys318Arg	1	7	28
ECM2	n.982T>C	Phe 328Leu	1	13	15
EXO84	n.2203T>C	Leu735Leu	1	4	50
IST1	n.328A>G	Arg110Gly	1	4	75
LSR1	n.1079T>C	(U2 snRNA)	1	29	10
LSR1	n.203T>C	(U2 snRNA)	1	12	16
LSR1	n.3A>G	(U2 snRNA)	1	26	11
MUD1	insA or delAA	Lys127fs or Gly128fs	43	99		A-11 stretch
PRP16	n.2148A>G	Ile716Met	1	10	20
PRP2	n.554A>G	Asn185Ser	1	10	20
PRP2	n.2540T>C	Leu847Pro	1	16	12
PRP21	n.345A>G	Ser115Ser	1	326	8
PRP22	n.92G>A	Gly31Asp	1	13	15
PRP22	n.331A>G	Thr111Ala	1	9	22
PRP24	n.995T>C	Leu332Pro	2	177	8
PRP24	n.1325T>C	Leu442Pro	4	93	8
PRP28	n.1590_1592delTGC	Ala531del	3	77	1	truncated read
PRP28	n.1590T>A	Arg530Arg	1	89	1	truncated read
PRP28		Gly529fs	14	110		truncated read
PRP28	n.1584A>T	Thr528Thr	30	230	56	truncated read
PRP31	n.295A>T	p.Asn99Tyr	1	137	29
PRP38	400dupATT	Tyr133dup	33	225	13
PRP4	n.879T>C	Asp293Asp	1	8	25
PRP4	n.864T>C	Thr288Thr	1	8	25
PRP40	n.804delA	Lys268fs	12	131	13
PRP42	n.519A>G	Glu173Glu	1	10	20
PRP42	n.620A>T	Glu207Val	1	7	28
PRP5	n.1024C>T	Leu342Leu	7	163	11
PRP5	n.2393A>G	Lys798Arg	1	6	33
PRP8	n.502T>C	Leu168Leu	1	192	8
PRP8	n.1916T>C	Phe639Ser	2	285	9
SMD3	n.10A>G	Asn4Asp	1	26	11
SNT309	n.61G>T	Asp21Tyr	1	7	28
SNT309	n.55G>C	Glu19Gln	1	7	28
SNU71	n.901delA	Met301fs	1	184	14
SPP382	n.395T>C	Ile132Thr	1	10	20
SPP382	n.382G>A	Val128Met	1	10	20
SPP41	n.1757A>G	Lys586Arg	1	15	13
SPP41	n.1596G>A	Met532Ile	1	8	25
SPP41	n.351A>G	Thr117Thr	1	168	9
SYF2	n.345A>G	Gln115Gln	1	202	8
SYF2	n.213T>A	Thr71Thr	56	166	100	true polymorphism
